# Supplementary material
Source: publisher figshare collection journal article supplement (https://acs.figshare.com/ndownloader/files/30636022)
Supplement: Supplementary file 1 [file 30636022]

## Supporting information

### **Fascinating Tin-Effects on the Enhanced and Large-Current-Density Water Splitting Performance of Sn-Ni(OH)<sub>2</sub>**

Juan Jian,<sup>a</sup> Xianyi Kou,<sup>a</sup> Hairui Wang,<sup>a</sup> Limin Chang,<sup>a,\*</sup> Le Zhang,<sup>b</sup> Shuang Gao,<sup>a</sup> Yue Xu<sup>a</sup> and Hongming Yuan<sup>b,\*</sup>

<sup>a</sup> Key Laboratory of Preparation and Applications of Environmental Friendly Material of the Ministry of Education, College of Chemistry, Jilin Normal University, Changchun 130103, P. R. China

<sup>b</sup> State Key Laboratory of Inorganic Synthesis and Preparative Chemistry, College of Chemistry, Jilin University, Changchun 130012, Qianjin Street 2699, P. R. China.

**\*Corresponding authors' E-mails:** changlimin2139@163.com; hmyuan@jlu.edu.cn

***Materials used in the experiment:***

Pt/C (20 wt %) is obtained from Macklin Ltd. (Shanghai, China), RuO<sub>2</sub> is synthesized from ruthenium chloride hydrate (RuCl<sub>3</sub>·xH<sub>2</sub>O) purchased from Aladdin Ltd. (Shanghai, China). Nickel foam (NF) is provided by the Li Yuan Technology Co. Ltd. (Shanxi, China). Na<sub>2</sub>SnO<sub>3</sub>·3H<sub>2</sub>O is bought from the Aladdin Ltd. (Shanghai, China). H<sub>2</sub>NCONH<sub>2</sub>, KOH, HCl and other chemicals are supplied by the Beijing chemical reagents company. All the chemicals are analytical pure and do not need the further purification. The NF cannot be directly used until treated by the acid solution (2.0 M HCl) and deionized water.

***Experimental instruments:***

- (1) X-ray diffraction (XRD) patterns were measured by the Rigaku D/Max 2550 X-ray diffract matter (the Cu K $\alpha$  radiation,  $\lambda = 1.5418 \text{ \AA}$ ).
- (2) X-ray photoelectron spectroscopy (XPS) was performed on an ESCALAB 250 X-ray photoelectron spectrometer with a monochromatic Al K $\alpha$  X-ray source ( $h\nu=1486.6 \text{ eV}$ ). The Au 4f<sub>7/2</sub>, Cu 2p<sub>3/2</sub> and Ag 3d<sub>5/2</sub> peak positions were used to calibrate the energy scale of spectrometer, and all binding energies were corrected by the C 1s peak (284.5 eV) corresponding to the C=C bonds. The standard deviation of the binding energy (BE) values was 0.1 eV.
- (3) The scanning electron microscopy (SEM) images were provided by JEOL JSM 6700 F electron microscope.
- (4) The transmission electron microscopy (TEM) images were obtained with JEM-2100 F microscope, equipped with a field emission gun operating at 200 KV.
- (5) The inductively coupled plasma atomic emission spectroscopy (ICP-AES) result was provided by the Perkin-Elmer Optima 3300 DV ICP spectrometer.
- (6) The X-ray fluorescence (XRF) result was given by the RIGAKU zsx Primus II, Japan.
- (7) Water drop contact angle (CA) experiment was carried out by the contact angle tester (JC-2000CD).

***Calculation of the loading mass:***

For that the Ni in the Ni(OH)<sub>2</sub> comes from the NF, thus, the mass difference before and after the hydrothermal reaction cannot give the certain loading information.

Inspired by the reaction of  $\text{CH}_4\text{N}_2\text{S}$  and nickel foam, the S in product  $\text{Ni}_3\text{S}_2$  comes from  $\text{CH}_4\text{N}_2\text{S}$ . We believe that all the O in  $\text{Ni}(\text{OH})_2$  comes from  $\text{CH}_4\text{N}_2\text{O}$ . Therefore, for every 1 mol of  $\text{Ni}(\text{OH})_2$  produced, 2 mol of  $\text{CH}_4\text{N}_2\text{O}$  will be consumed. To make sure the molecular formula of the as synthesized  $\text{Sn-Ni}(\text{OH})_2$ , we assume all the reactants ( $\text{CH}_4\text{N}_2\text{O}$  and  $\text{Na}_2\text{SnO}_3 \cdot 3\text{H}_2\text{O}$ ) have took part in the reaction. Hence, the mole ratio of  $\text{CH}_4\text{N}_2\text{O}$  to  $\text{Na}_2\text{SnO}_3 \cdot 3\text{H}_2\text{O}$  is 30 : 1, that is, the mole ratio of Ni and Sn is 15 : 1 and the  $\text{Sn-Ni}(\text{OH})_2$  can be written as  $\text{Sn}_{0.0625}\text{Ni}_{0.9375}(\text{OH})_2$ , and its molar mass ( $M_{\text{Sn-Ni}(\text{OH})_2}$ ) is  $96.44 \text{ g mol}^{-1}$ , while  $M_{\text{Ni}(\text{OH})_2}$  is  $92.69 \text{ g mol}^{-1}$ .

The XRF result (Figure S2) of NF-based  $\text{Sn-Ni}(\text{OH})_2$  certifies that the mass ratio of Ni and Sn is about 99.35 : 0.65. When the reaction condition are the same, the average evaluated mass for a series of the formed NF-based  $\text{Sn-Ni}(\text{OH})_2$  is 0.2418 g. Thus, following the XRF data, the mass of Sn in  $\text{Sn-Ni}(\text{OH})_2$  is  $m_{\text{Sn}} \approx 0.001572 \text{ g}$ , and the  $m_{\text{Sn-Ni}(\text{OH})_2} \approx 0.01647 \text{ g}$ . As a result, the  $m_{\text{loading}} = m_{\text{Sn-Ni}(\text{OH})_2} / (1 * 9 \text{ cm}^2) \approx 1.83 \text{ mg cm}^{-2}$ .

About the  $\text{TOF}_{(\text{O}_2)} = (j * A) / (4 * n * F)$ , where “n” is the amount of catalyst substance on the electrode surface that participating in the OER course. Though not all the substance loaded on NF surface took part in the OER process, we still suspect that all of them have participated in the OER course. Therefore, when catalyst with the area (A) of  $0.25 \text{ cm}^2$  take part into the reaction, the  $n = A * m_{\text{loading}} / M_{\text{Sn-Ni}(\text{OH})_2}$ . Thus,  $\text{TOF}_{(\text{O}_2)} \approx j * 0.1366 \text{ cm}^2 \text{ C}^{-1} = j * 0.1366 \text{ s}^{-1}$ . For that  $\text{TOF}_{(\text{H}_2)} = (j * A) / (2 * n * F)$ , hence,  $\text{TOF}_{(\text{H}_2)} = j * 0.2732 \text{ s}^{-1}$ .

### **Measurement of the Faraday efficiency (FE):**

Faraday efficiency (FE) of  $\text{Sn-Ni}(\text{OH})_2$  for OER can be calculated by the ratio of the amount of  $\text{O}_2$  collected by drainage method and the theoretical  $\text{O}_2$ .

The actual amount  $\text{O}_2$  production (labeled as  $n_{\text{o-experimental}}$ ) can be calculated using the equation of  $n_{\text{o-experimental}} = V / V_m$ , where V is the volume of  $\text{O}_2$  collected from the chronoamperometry testing;  $V_m$  is molar volume of ideal gas, and  $V_m = 22.4 \text{ L mol}^{-1}$ .

For the theoretical  $\text{O}_2$  ( $n_{\text{o-theoretical}}$ ) accumulated during the OER. According the OER equation of  $4\text{OH}^- \rightarrow \text{O}_2 + 2\text{H}_2\text{O} + 4\text{e}^-$ , where, the electrolytic efficiency ( $\eta$ ) can be measured by the equation of  $\eta = z * n * F / Q$ . Here, “n” is the mole of  $\text{O}_2$  generated during the OER, and can be marked as  $n_{\text{o-theoretical}}$ ; “z” is the number of transferred

electrons generated per mole of O<sub>2</sub> during the OER, here,  $z = 4$ ; “F” is the Faraday constant,  $F = 96485 \text{ C mol}^{-1}$ ; “Q” refers to the actual quantity of electric charge, and can be calculated by the flume of  $Q = \sum i * t$ . In the chronoamperometry experiment, the Q can be directly calculated.

To evaluate the FE of a catalyst for OER, we assume that 100 % current efficiency occurs during the whole reaction. Hence,  $\eta = 1 = 4 * F * n_{\text{o-theoretical}} / Q$ , therefore,  $n_{\text{o-theoretical}} = Q / (4 * F)$ .<sup>[1-3]</sup>

### ***The calculation of density functional theory (DFT):***

The spin-polarized density functional theory (DFT) calculations were carried out using the Quantum ESPRESSO.<sup>[4]</sup> The exchange-correlation functional was described by the Perdew-Burke-Ernzerhof (PBE) parameterization of the generalized gradient approximation (GGA).<sup>[5]</sup> The interactions between electrons and ions were treated within the projector augmented-wave (PAW) approximation.<sup>[6]</sup> A cutoff energy of 400 eV was employed for the plane-wave basis set. And a conjugate-gradient algorithm was used to relax the atoms into their instantaneous ground state positions. Besides, the structural optimizations were not stopped until the atomic forces were less than 0.01 eV per Å. The first irreducible Brillouin zone was modeled based on the Gamma-centered scheme, where  $6 \times 6 \times 1$  k-point grid was used in geometry optimizations and electronic structure analysis. The vdW-D3 method was adopted to describe the van der Waals interactions.<sup>[7]</sup> A vacuum of 20 Å width was employed to avoid the interactions between periodic images in the z direction.

The change of the Gibbs free energy ( $\Delta G$ ) for each elementary step at the zero potential can be written as:

$$\Delta G_{(0)} = \Delta E + \Delta E_{\text{ZPE}} - T\Delta S$$

Where E is the energy directly obtained from the DFT calculations.  $E_{\text{ZPE}}$  is the zero-point energy calculated from the equation of  $E_{\text{ZPE}} = 1/2 \sum h\nu$ , in which  $\nu$  is the vibrational frequency of a normal mode; h is the Planck constant; S is the entropy that can be calculated as:<sup>[8]</sup>

$$S(T) = k_B \sum_i \left( \frac{h\nu_i}{k_B T} \frac{1}{\exp\left(\frac{h\nu_i}{k_B T} - 1\right)} - \ln \left( 1 - \exp\left(\frac{h\nu_i}{k_B T} - 1\right) \right) \right)$$

$k_B$  and  $\nu_i$  are the Boltzmann constant and vibrational frequency, respectively.

Considering OER mainly processing follow four-steps:

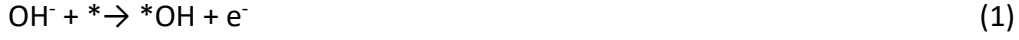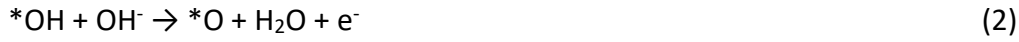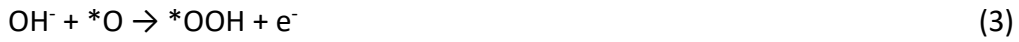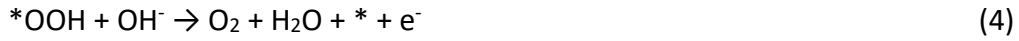

When forming one molecule of  $\text{O}_2$  in the reaction step, the reaction free energy can be expressed as  $\Delta G_{(2\text{H}_2\text{O} \rightarrow \text{O}_2 + 2\text{H}_2)} = 4.92 \text{ eV} = E_{\text{O}_2} + 2E_{\text{H}_2} - 2E_{\text{H}_2\text{O}} + (\Delta \text{ZPE} - T\Delta S)_{(2\text{H}_2\text{O} \rightarrow \text{O}_2 + 2\text{H}_2)}$ . Hence, the reaction free energy of each step can be expressed as follows:

$$\Delta G_{(1)} = E(*\text{OH}) - E(*) - E_{\text{H}_2\text{O}} + 1/2 E_{\text{H}_2} + (\Delta \text{ZPE} - T\Delta S)_{(1)} \quad (5)$$

$$\Delta G_{(2)} = E(*\text{O}) - E(*\text{OH}) + 1/2 E_{\text{H}_2} + (\Delta \text{ZPE} - T\Delta S)_{(2)} \quad (6)$$

$$\Delta G_{(3)} = E(*\text{OOH}) - E(*\text{O}) - E_{\text{H}_2\text{O}} + 1/2 E_{\text{H}_2} + (\Delta \text{ZPE} - T\Delta S)_{(3)} \quad (7)$$

$$\Delta G_{(4)} = E(*) - E(*\text{OOH}) + E_{\text{O}_2} + 1/2 E_{\text{H}_2} + (\Delta \text{ZPE} - T\Delta S)_{(4)} \quad (8)$$

where  $E(*)$ ,  $E(*\text{OH})$ ,  $E(*\text{O})$ , and  $E(*\text{OOH})$  are the computed DFT energies of the pure surface and the adsorbed surfaces with  $*\text{OH}$ ,  $*\text{O}$  and  $*\text{OOH}$ , respectively.  $E_{\text{H}_2\text{O}}$ ,  $E_{\text{H}_2}$  and  $E_{\text{O}_2}$  are the computed energies for the sole  $\text{H}_2\text{O}$ ,  $\text{H}_2$  and  $\text{O}_2$  molecules, respectively. As a result, the reaction overpotential can be obtained by evaluating the difference between the minimum voltage needed for the OER.

As for the HER ( $\text{H}^+ + \text{e}^- \rightarrow 1/2 \text{H}_2$ ), the HER catalytic activities are evaluated by computing the  $\Delta G_{\text{H}^*}$  values of possible catalytic sites according to the equation:

$$\Delta G_{\text{H}^*} = \Delta E_{\text{H}^*} + \Delta \text{ZPE} - T\Delta S \quad (9)$$

In addition, the binding energy of  $\text{H}_2\text{O}$  is calculated as formula:

$$\Delta E_{\text{ads}} = E_{\text{substrate}+\text{H}_2\text{O}} - E_{\text{substrate}} - E_{\text{H}_2\text{O}} \quad (10)$$

where  $E_{\text{substrate}+\text{H}_2\text{O}}$ ,  $E_{\text{substrate}}$ , and  $E_{\text{H}_2\text{O}}$  are the total energies of the whole system, the substrate, and the gas phase  $\text{H}_2\text{O}$  molecule, respectively.

## Supplementary Figures

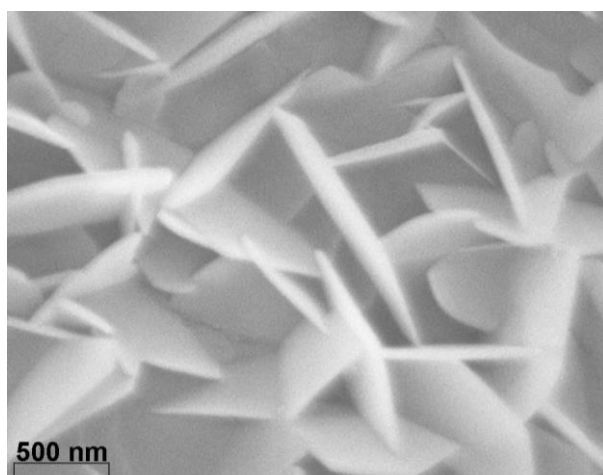

**Figure S1.** The SEM image of pure  $\text{Ni(OH)}_2$ .

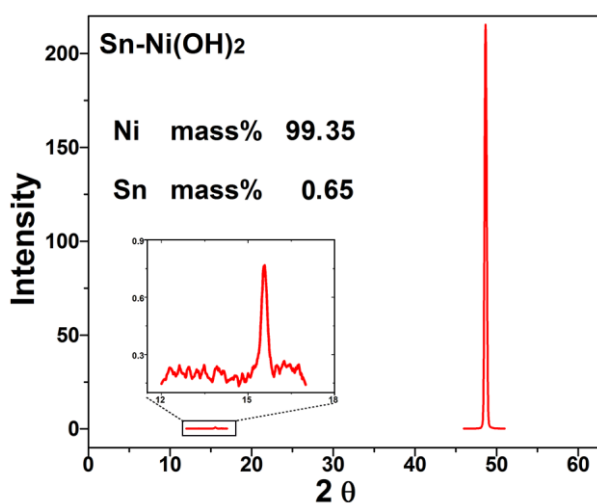

**Figure. S2.** The X-ray fluorescence (XRF) result of Ni and Sn in the  $\text{Sn-Ni(OH)}_2$ , insert picture is the magnified image of the curves at  $2\theta$  range of  $12 \sim 18^\circ$ . Note, the range (R) of the XRF data is 0.00139,  $R\% = 1.39$ .

**Table S1.** The ICP-AES results of Sn and Ni in the  $\text{Sn-Ni(OH)}_2$ , concentration of the standard solution is  $10 \text{ mg mL}^{-1}$ .

| Elements                | Ni <sub>2316</sub> | Sn <sub>1899</sub> |
|-------------------------|--------------------|--------------------|
| Average content (ppm)   | 241.8              | 0.2849             |
| Standard deviation (SD) | 6.3                | 0.0008             |
| % RSD                   | 2.605              | 0.2808             |

Note, ppm refers to the mass concentration, and is the abbreviation of part per million.

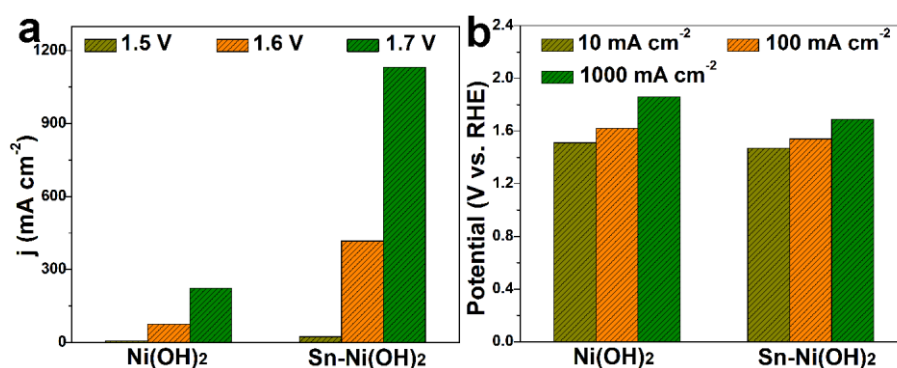

**Figure S3.** The bar graphs between a) potentials and b) current densities of Ni(OH)<sub>2</sub> and Sn-Ni(OH)<sub>2</sub> for OER.

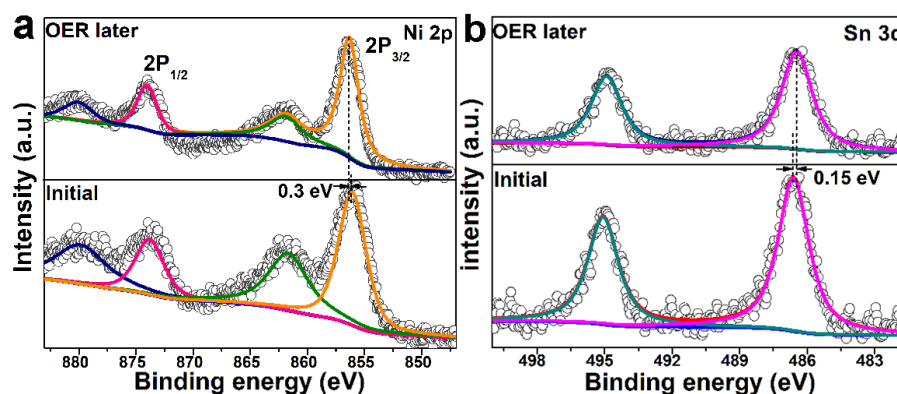

**Figure S4.** The XPS results of a) Ni 2p, b) Sn 3d of Sn-Ni(OH)<sub>2</sub> after the OER.

As shown in the Figure S4, after the OER process, both the Ni 2p and the Sn 3d have some difference with the initial ones, the corresponding spectrum shift of 0.3 eV and -0.15 eV, respectively, certifies the strong electronic intercalation between Ni and Sn.

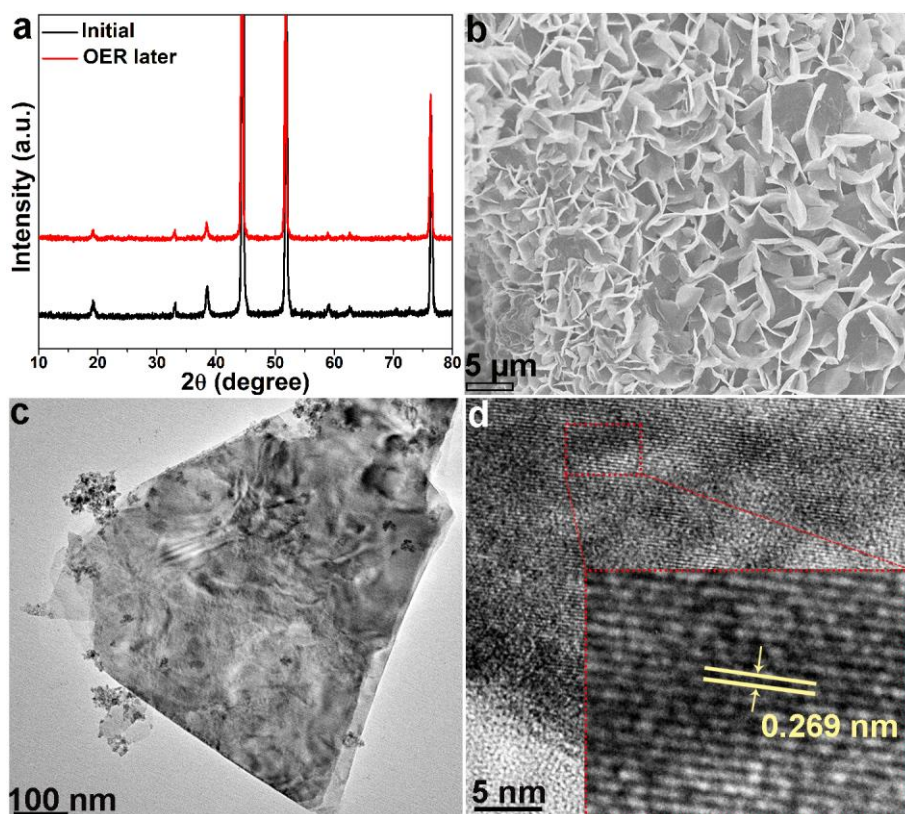

**Figure S5.** The a) XRD results, b) SEM and c,d) HRTEM images of Sn-Ni(OH)<sub>2</sub> after OER.

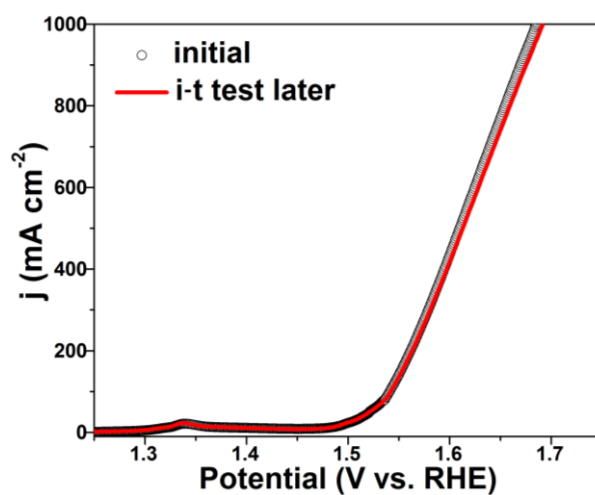

**Figure S6.** The LSV curves before (black) and after (red) the i-t test.



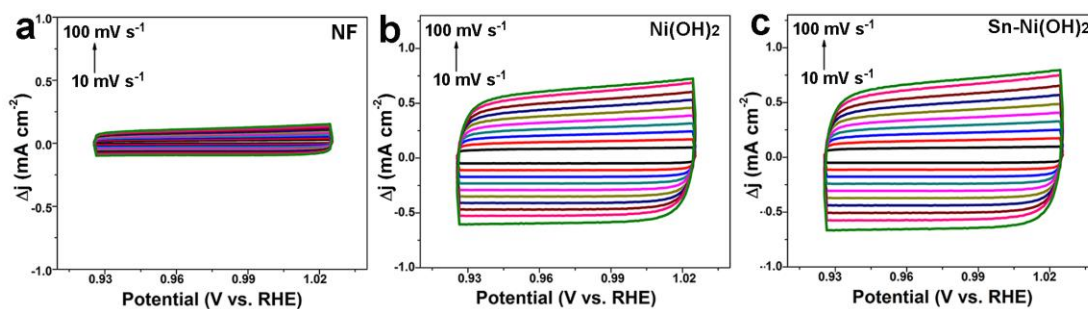

**Figure S7.** The CV curves of a) NF, b)  $\text{Ni(OH)}_2$ , c)  $\text{Sn-Ni(OH)}_2$  with different scan rates at the range of 0.9254-1.0254 V (vs. RHE).

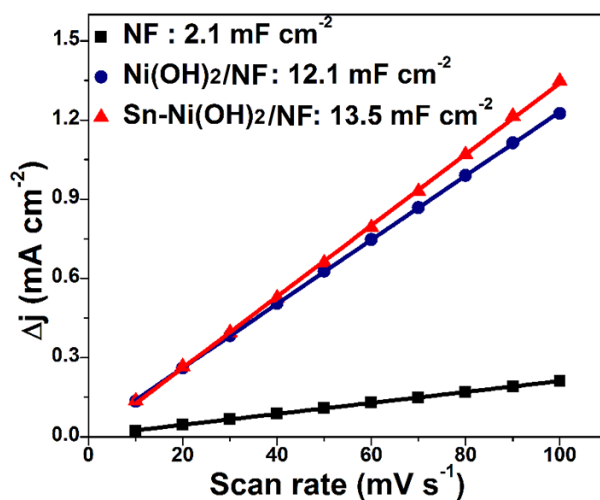

**Figure S8.** The corresponding fitted slope curves of NF (black),  $\text{Ni(OH)}_2$  (blue) and  $\text{Sn-Ni(OH)}_2$  (red).

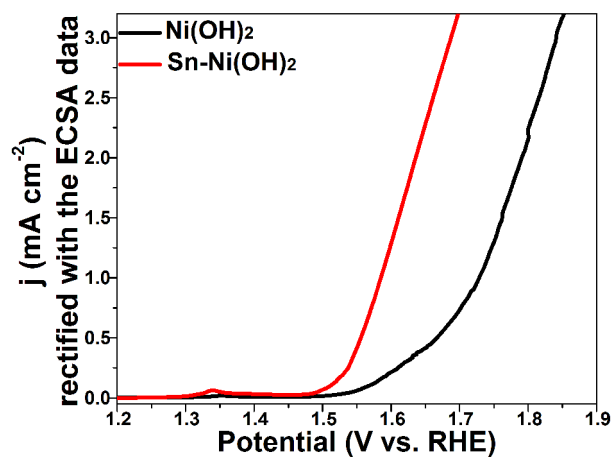

**Figure S9.** The LSV curves of  $\text{Sn-Ni(OH)}_2$  (red) and  $\text{Ni(OH)}_2$  (black) that rectified with the ECSA data.

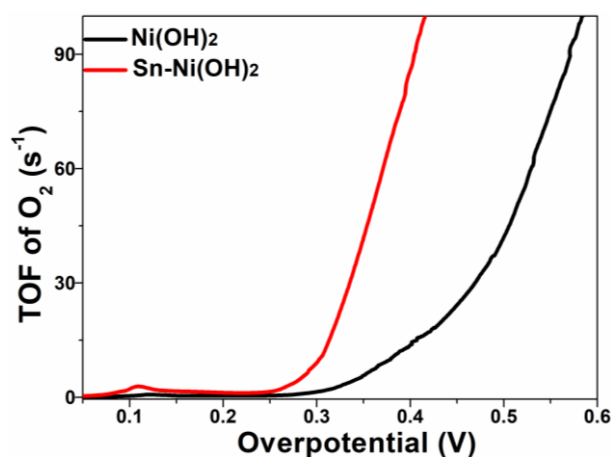

**Figure S10.** The TOF of O<sub>2</sub> curves for Sn-Ni(OH)<sub>2</sub> (red) and Ni(OH)<sub>2</sub> (black).

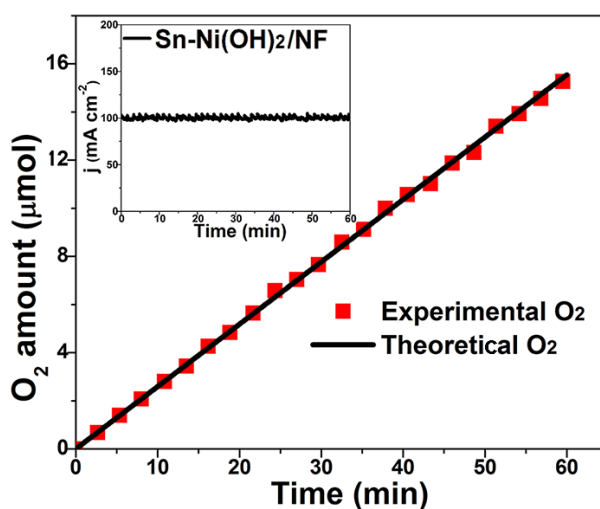

**Figure S11.** The relationship between time and the generated O<sub>2</sub> (both experimental and theoretical) during the OER course, insert is the corresponding i-t curves.

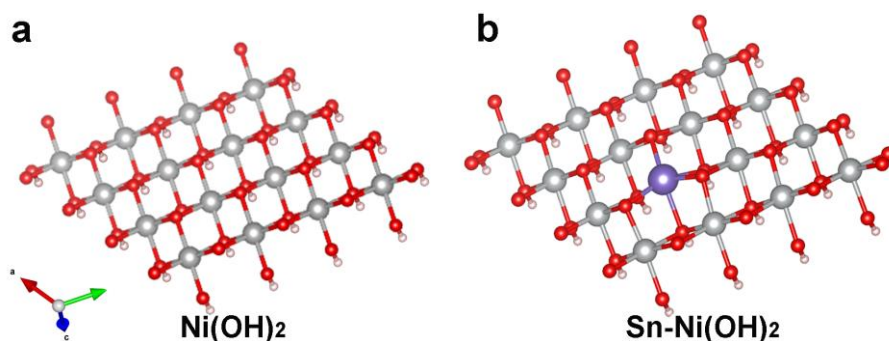

**Figure S12.** The slab models of the a) Ni(OH)<sub>2</sub>, and b) Sn-Ni(OH)<sub>2</sub> system. Noted, the sphere of gray, purple, red and pink are referred to the Ni, Sn, O and H atoms, respectively (In order to make the image more intuitive, the top H is ignored).

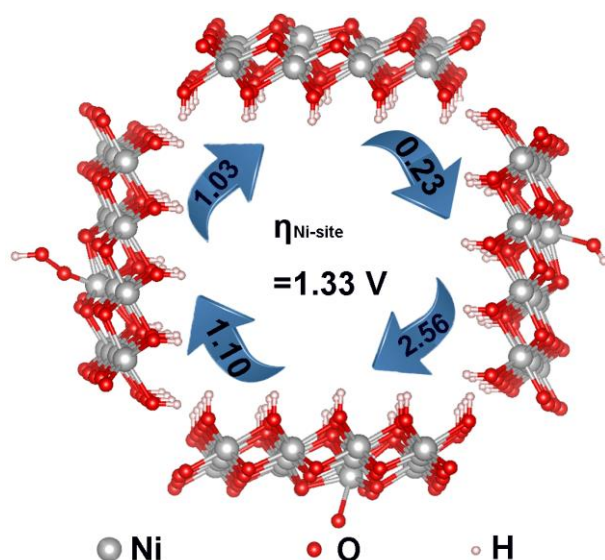

**Figure S13.** The optimized structures of \*OH, \*O, and \*OOH adsorptions of Ni(OH)<sub>2</sub> during the OER process. Note that the gray, red and pink spheres represent Ni, O and H atoms, respectively.

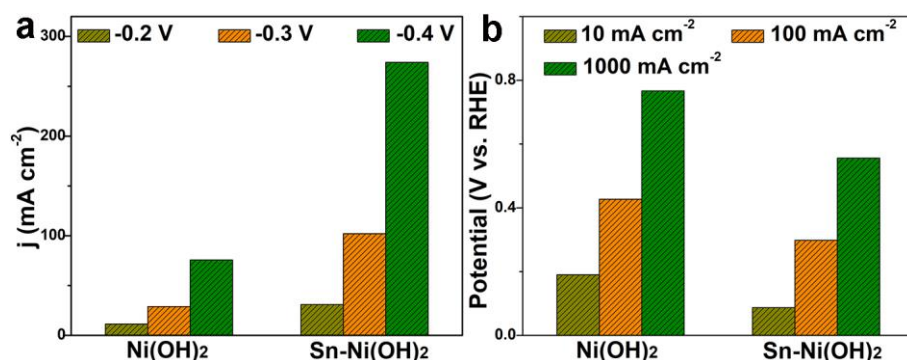

**Figure S14.** The bar graphs between a) potentials and b) current densities of Ni(OH)<sub>2</sub> and Sn-Ni(OH)<sub>2</sub> for HER.

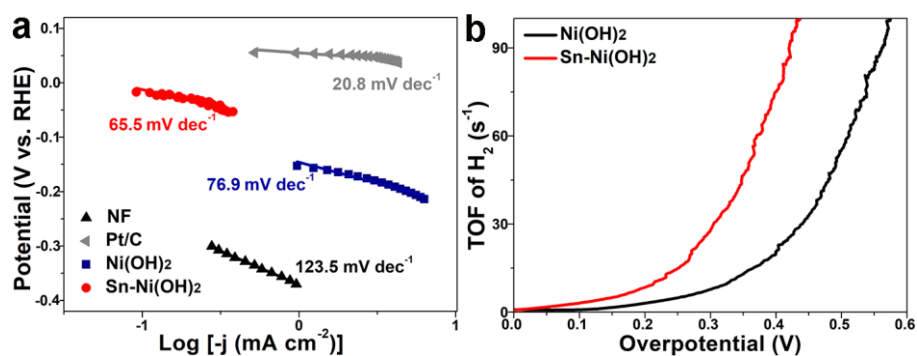

**Figure S15.** The a) Tafel slopes of NF, Pt/C, Ni(OH)<sub>2</sub> and Sn-Ni(OH)<sub>2</sub> during the HER, b) TOF of H<sub>2</sub> curves for Sn-Ni(OH)<sub>2</sub> (red) and Ni(OH)<sub>2</sub> (black).

As shown in Figure S15a, Sn-Ni(OH)<sub>2</sub> has lower Tafel slope data than the undoped Ni(OH)<sub>2</sub>, demonstrating that the current density of Sn-Ni(OH)<sub>2</sub> changes faster with

voltage, that is, it has a faster reaction kinetics than the  $\text{Ni(OH)}_2$ . In addition, in alkaline electrolyte, HER mainly follow the steps below:<sup>[9]</sup>

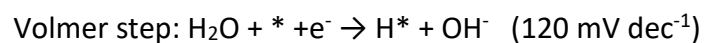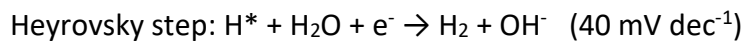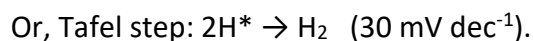

Hence, Tafel slope value of  $\text{Sn-Ni(OH)}_2$  confirms that during the HER course,  $\text{Sn-Ni(OH)}_2$  occurs via a Volmer-Heyrovsky mechanism, in which the recombination of adsorbed H atom with  $\text{H}_2\text{O}$  is the rate-determining step.<sup>[10]</sup>

**Table S2.** Comparison of some recently reported OER electrocatalysts.

| Catalysts                               | $\eta_{10 \text{ mA cm}^{-2}}$<br>(mV) | $\eta_{100 \text{ mA cm}^{-2}}$<br>(mV) | $\eta_{1000 \text{ mA cm}^{-2}}$<br>(mV) | Reference                             |
|-----------------------------------------|----------------------------------------|-----------------------------------------|------------------------------------------|---------------------------------------|
| Sn-Ni(OH) <sub>2</sub>                  | 246                                    | 312                                     | 460                                      | This work                             |
| Ni(OH) <sub>2</sub>                     | 290                                    | 396                                     | 630                                      | This work                             |
| RuO <sub>2</sub>                        | 260                                    | 340                                     | 710                                      | This work                             |
| P-MoS <sub>2</sub> @CoP                 | 282                                    | —                                       | —                                        | ChemSusChem 2021,<br>14, 1565-1573    |
| NiFeW/NF                                | 224                                    | 266                                     | —                                        | ChemSusChem 2021,<br>14, 1324-1335    |
| Co <sub>3</sub> Mo/Cu                   | $\eta_{\text{onset}} \approx 261$      | $\approx 330$                           | —                                        | Nat. Commun. 2020,<br>11, 2940        |
| W-Ni(OH) <sub>2</sub> /NF               | 237                                    | —                                       | —                                        | Nat. Commun. 2019,<br>10, 2149        |
| MoS <sub>2</sub> -NiS <sub>2</sub> /NGF | $\approx 370$                          | —                                       | —                                        | Appl. Catal., B, 2019,<br>254, 15     |
| Co/CNFs                                 | 320                                    | $\approx 450$                           | —                                        | Adv. Mater. 2019, 31,<br>1808043      |
| CuCoS nanosheets                        | 310                                    | —                                       | —                                        | ACS Catal. 2017, 7,<br>5871-5879      |
| NiPS <sub>3</sub> nanosheets            | 294                                    | $\approx 370$                           | —                                        | ACS Nano 2018, 12,<br>5297-5305       |
| CoS <sub>x</sub> /NGF                   | 315                                    | —                                       | —                                        | ACS Nano 2018, 12,<br>12369-12379     |
| NiFe-LDH/NF                             | 300                                    | —                                       | —                                        | Nat. Commun. 2014,<br>5, 4477         |
| NiCoFe-LDH/NF                           | 340                                    | —                                       | —                                        | Adv. Energy Mater.<br>2015, 5, 500245 |
| CoFePO/NF                               | 274.5                                  | $\approx 410$                           | —                                        | ACS Nano 2016, 10,<br>8738            |
| RuO <sub>2</sub> /NiO/NF                | 250                                    | $\approx 330$                           | —                                        | Small 2018, 14,<br>1704073            |
| Fe-Ni <sub>3</sub> S <sub>2</sub> /FeNi | 282                                    | $\approx 470$                           | —                                        | Small 2017, 13,                       |

|                                                      |                                |       |                                   |                                             |
|------------------------------------------------------|--------------------------------|-------|-----------------------------------|---------------------------------------------|
|                                                      |                                |       |                                   | 1604161                                     |
| Fe-NiSe/NF                                           | 233                            | 275   | —                                 | J. Mater. Chem. A, 2017, 5, 14639           |
| CoMoO/NF                                             | 270                            | 330   | —                                 | Nano energy 2018,45,448                     |
| P-CoNiS/NF                                           | 292.2                          | ≈ 300 | ≈ 440 (@500 mA cm <sup>-2</sup> ) | ACS Appl. Mater. Interfaces 2018, 10, 7087  |
| NiOOH/Ni(OH) <sub>2</sub>                            | 390.5                          | —     | —                                 | ChemSusChem 2019, 12, 1469                  |
| Ni <sub>3</sub> Fe/N-C sheets                        | 390                            | ≈ 320 | —                                 | Adv. Energy Mater. 2017, 7, 1               |
| CoS <sub>x</sub> /Ni <sub>3</sub> S <sub>2</sub> @NF | 280 (@20 mA cm <sup>-2</sup> ) | ≈ 390 | —                                 | ACS Appl. Mater. Interfaces 2018, 33, 27712 |
| NiFe-LDH/Fe-N-C                                      | 310                            | —     | —                                 | Energy Environ. Sci., 2016, 9, 2020         |

**Table S3.** The fitted slopes, double-layer-capacitance ( $C_{dl}$ ) and corresponding electrochemical surface area (ECSA) results of Ni(OH)<sub>2</sub> and Sn-Ni(OH)<sub>2</sub>.

| Elements                                                    | NF                    | Ni(OH) <sub>2</sub>   | Sn-Ni(OH) <sub>2</sub> |
|-------------------------------------------------------------|-----------------------|-----------------------|------------------------|
| Fitted slope (mF cm <sup>-2</sup> )                         | 4.2                   | 24.2                  | 27.0                   |
| Standard error for slope                                    | 6.97×10 <sup>-6</sup> | 4.04×10 <sup>-5</sup> | 8.02×10 <sup>-5</sup>  |
| Double-layer-capacitance ( $C_{dl}$ , mF cm <sup>-2</sup> ) | 2.1                   | 12.1                  | 13.5                   |
| Electrochemical surface area (ECSA, cm <sup>2</sup> )       | 13.12                 | 75.62                 | 84.38                  |

Note, ECSA = A \*  $C_{dl}$  /  $C_s$ , here, A = 0.25 cm<sup>2</sup>,  $C_s$  = 0.04 mF cm<sup>-2</sup>.

**Table S4.** Comparison of some recently reported HER electrocatalysts.

| Catalysts                                                          | $\eta_{10 \text{ mA cm}^{-2}}$<br>(mV) | $\eta_{100 \text{ mA cm}^{-2}}$<br>(mV) | $\eta_{1000 \text{ mA cm}^{-2}}$<br>(mV) | Reference                                                 |
|--------------------------------------------------------------------|----------------------------------------|-----------------------------------------|------------------------------------------|-----------------------------------------------------------|
| Sn-Ni(OH) <sub>2</sub>                                             | 87                                     | 298                                     | 556                                      | This work                                                 |
| Ni(OH) <sub>2</sub>                                                | 190                                    | 427                                     | 767                                      | This work                                                 |
| Pt/C                                                               | 20.6                                   | 184                                     | —                                        | This work                                                 |
| N, B-Ni <sub>2</sub> P/G                                           | 124                                    | —                                       | —                                        | Appl. Catal. B: Environ. 2020, <b>278</b> , 119284        |
| RhSe <sub>2</sub>                                                  | 81.6                                   | —                                       | —                                        | Adv. Mater. 2021, <b>33</b> , 2007894                     |
| Au/CoP@NC-3                                                        | 140.9                                  | —                                       | —                                        | ACS Appl. Mater. Interfaces 2020, <b>12</b> , 16548-16556 |
| P-CoS <sub>2</sub> /Ti                                             | 91                                     | —                                       | —                                        | Nanoscale 2020, <b>12</b> , 11573-11581                   |
| P-MoS <sub>2</sub> @CoP                                            | 64                                     | 141                                     | 458                                      | ChemSusChem 2021, <b>14</b> , 1565-1573                   |
| H-MoS <sub>2</sub> /MoP                                            | 92                                     | —                                       | —                                        | Small 2020, 2002482                                       |
| Co/CNFs                                                            | 190                                    | —                                       | —                                        | Adv. Mater., 2019, <b>31</b> , 1808043                    |
| CoFeZr oxides/NF                                                   | 104                                    | ≈230                                    | —                                        | Adv. Mater., 2019, 1901439                                |
| CoFe@NiFe/NF                                                       | 240                                    | ≈340                                    | —                                        | Appl. Catal., B, 2019, <b>253</b> , 131                   |
| Co <sub>9</sub> O <sub>8</sub> /Ni <sub>3</sub> S <sub>2</sub> /NF | 128                                    | ≈230                                    | —                                        | Appl. Catal., B, 2019, <b>253</b> , 246                   |
| MoS <sub>2</sub> -NiS <sub>2</sub> /NGF                            | 172                                    | —                                       | —                                        | Appl. Catal., B, 2019, <b>254</b> , 15                    |
| Ni doped graphitic carbon (NGC)                                    | 220                                    | ≈580                                    | —                                        | Carbon, 2019, <b>150</b> , 21                             |
| NiOOH/Ni(OH) <sub>2</sub>                                          | 147                                    | —                                       | —                                        | ChemSusChem, 2019, <b>12</b> , 1469                       |

|                                                          |       |      |                                |                                                      |
|----------------------------------------------------------|-------|------|--------------------------------|------------------------------------------------------|
| CoMoP nanosheet arrays@NF                                | 173   | ≈305 | —                              | Nano Energy, 2018, <b>45</b> , 448                   |
| Ni <sub>3</sub> FeN/r-GO                                 | 94    | ≈200 | —                              | ACS Nano, 2018, <b>12</b> , 245                      |
| P-Co <sub>3</sub> O <sub>4</sub> /NF                     | 97    | —    | —                              | ACS Catal., 2018, <b>8</b> , 2236                    |
| CoP@3D Ti <sub>3</sub> C <sub>2</sub> -MXene             | 168   | —    | —                              | ACS Nano, 2018, <b>12</b> , 8017                     |
| Co/Co <sub>2</sub> Mo <sub>3</sub> O <sub>8</sub> /NF    | 25    | ≈210 | —                              | ACS Catal., 2018, <b>8</b> , 5062                    |
| P-doped CoNiS/NF                                         | 187.4 | ≈220 | ≈240 (500 mAc <sup>m-2</sup> ) | ACS Appl. Mater. Interfaces, 2018, <b>10</b> , 7087  |
| N-doped Ni <sub>3</sub> S <sub>2</sub> nanosheets        | 155   | ≈320 | —                              | Adv. Energy Mater., 2018, <b>8</b> , 1703538         |
| Sn-Ni <sub>3</sub> S <sub>2</sub> /NF                    | 35    | 170  | 570                            | ACS Appl. Mater. Interfaces, 2018, <b>10</b> , 40568 |
| Ni <sub>2</sub> P-Ni <sub>3</sub> S <sub>2</sub> HNAs/NF | 80    | ≈180 | —                              | Nano Energy, 2018, <b>51</b> , 26                    |
| N-Ni <sub>3</sub> S <sub>2</sub> / NF                    | 110   | ≈250 | —                              | Adv. Mater., 2017, <b>29</b> , 1701584               |
| Cu@CoS <sub>x</sub> /Cu Foam                             | 134   | 267  | —                              | Adv. Mater., 2017, <b>29</b> , 1606200               |



**Table S5.** Comparison of some recently reported OWS electrocatalysts.

| Catalysts                                                          | E <sub>10 mA cm<sup>-2</sup></sub> (V) | E <sub>100 mA cm<sup>-2</sup></sub> (V) | Reference                                     |
|--------------------------------------------------------------------|----------------------------------------|-----------------------------------------|-----------------------------------------------|
| Sn-Ni(OH) <sub>2</sub>   Sn-Ni(OH) <sub>2</sub>                    | <b>1.58</b>                            | <b>1.87</b>                             | <b>This work</b>                              |
| Ni(OH) <sub>2</sub>   Ni(OH) <sub>2</sub>                          | <b>1.65</b>                            | <b>2.03</b>                             | <b>This work</b>                              |
| Pt/C  RuO <sub>2</sub>                                             | <b>1.57</b>                            | <b>1.84</b>                             | <b>This work</b>                              |
| Nano-KFO/NF                                                        | 1.59                                   | 1.73                                    | J. Mater. Chem. A, 2021, <b>9</b> , 7586-7593 |
| P-MoS <sub>2</sub> @CoP                                            | —                                      | 1.68                                    | ChemSusChem 2021, <b>14</b> , 1565-1573       |
| Co <sub>3</sub> Mo/Cu                                              | —                                      | 1.62                                    | Nat. Commun. 2020, <b>11</b> , 2940           |
| Co-MOF/H <sub>2</sub>                                              | 1.619                                  | —                                       | Nanoscale 2020, <b>12</b> , 8969.             |
| Co/CNFs                                                            | 1.60                                   | —                                       | Adv. Mater., 2019, <b>31</b> , 1808043        |
| CoFeZr oxides/NF                                                   | 1.63                                   | ≈1.80                                   | Adv. Mater., 2019, 1901439                    |
| CoFe@NiFe/NF                                                       | 1.59                                   | —                                       | Appl. Catal., B, 2019, <b>253</b> , 131       |
| Co <sub>9</sub> S <sub>8</sub> /Ni <sub>3</sub> S <sub>2</sub> /NF | 1.64                                   | —                                       | Appl. Catal., B, 2019, <b>253</b> , 246       |
| MoS <sub>2</sub> -NiS <sub>2</sub> /NGF                            | 1.64                                   | —                                       | Appl. Catal., B, 2019, <b>254</b> , 15        |
| Ni doped graphitic carbon (NGC)                                    | 1.64                                   | —                                       | Carbon, 2019, <b>150</b> , 21                 |
| CoMoO nanosheet arrays@NF                                          | 1.68                                   | ≈1.88                                   | Nano Energy, 2018, <b>45</b> , 448            |
| Ni <sub>3</sub> FeN/r-GO                                           | 1.60                                   | ≈1.96                                   | ACS Nano, 2018, <b>12</b> , 245               |
| P-Co <sub>3</sub> O <sub>4</sub> /NF                               | 1.63                                   | —                                       | ACS Catal., 2018, <b>8</b> , 2236             |
| CoP@3D Ti <sub>3</sub> C <sub>2</sub> -MXene                       | 1.57                                   | ≈1.70                                   | ACS Nano, 2018, <b>12</b> , 8017              |

|                                          |      |   |                                                     |
|------------------------------------------|------|---|-----------------------------------------------------|
| P-doped Co-Ni-S/NF                       | 1.60 | — | ACS Appl. Mater. Interfaces, 2018, <b>10</b> , 7087 |
| NiFe/Ni(OH) <sub>2</sub> /NiAl           | 1.59 | — | Adv. Sci., 2017, <b>4</b> , 1700084                 |
| Ni <sub>3</sub> S <sub>2</sub> -NGQDs/NF | 1.58 | — | Small, 2017, <b>13</b> , 1700264                    |
| N(P)-doped 304-type stainless steel mesh | 1.74 | — | Adv. Mater., 2017, 1702095                          |

**References for the supporting information:**

- [1] Liu, Y. P.; Zou, X. X. et al, *Nat. Commun.* **2018**, 9, 2609.
- [2] Suryanto, B. H. R.; Zhao, C. et al, *Nat. Commun.* **2019**, 10, 5599.
- [3] Zou, X. X.; Zhang Y. *Chem. Soc. Rev.*, **2015**, 44, 5148-5180.
- [4] Giannozzi, P.; Baroni, S. et al. *J. Phys. Condens. Matter* **2009**, 21, 395502.
- [5] J. P. Perdew, K. Burke and M. Ernzerhof, *Phys. Rev. Lett.*, **1996**, 77, 3865.
- [6] P. E. Blöchl, *Phys. Rev. B: Condens. Matter Mater. Phys.*, **1994**, 50, 17953-17979.
- [7] S. Grimme, J. Antony, S. Ehrlich and H. Krieg, *J. Chem. Phys.*, **2010**, 132, 154104.
- [8] Björk, *J. Phys. Chem. C*, **2016**, 120, 21716-21721.
- [9] Liu, B. Z.; Peng, Y. et al, *Nat. Commun.* **2019**, 10, 631.
- [10] Chen, H.; Ai, X.; Zou, X. X. et al. *Angew. Chem. Int. Ed.* **2019**, 58, 1-6.
